# Supplementary material for: Controlled Chaos of Polymorphic Mucins in a Metazoan Parasite (Schistosoma mansoni) Interacting with Its Invertebrate Host (Biomphalaria glabrata)
Source: PLoS Negl Trop Dis. 2008 Nov 11;2(11):e330. doi: 10.1371/journal.pntd.0000330 (PMC2576457; doi:10.1371/journal.pntd.0000330)
Supplement: Table S1 — cDNA variants obtained for 11 individuals from both Compatible and Incompatible strains. aStrain Compatible (C) or Incompatible (IC) and individual number (1–11). bref-(x) = variant used as reference for mutation identification, x refers to SmPoMuc group. cTR = Tandem Repeats contained in each variant. - number and type of TR is indicated. - °(x) Synonymous mutation (SM) present in the xth repeat of the stretch. - *(x) Non synonymous mutation (NSM) present in the xth repeat of the stretch. dexon characteristics of each variant: - exon presence or absence is annotated by x or in grey, respectively. - green, blue, orange and red exons contain SM, NSM, SM+NSM and STOP codon, respectively. - //+ indicates partial intron inclusion. - //− indicates partial exon exclusion. esplicing events: - AS = Alternative Splicing with conservation of ORF. - AbS (x) = Aberrant Splicing; x refer to AbS type described in Figure 9. (447 KB PDF) [file pntd.0000330.s001.pdf]

**Table S1: cDNA variants obtained for 11 individuals from both Compatible and Incompatible strains**

| Compatible strain |                               |                               |                   |   |   |   |   |      |      |    |    |    |    |    |    |        |    |                       |
|-------------------|-------------------------------|-------------------------------|-------------------|---|---|---|---|------|------|----|----|----|----|----|----|--------|----|-----------------------|
| ind <sup>a</sup>  | SmPoMuc <sup>b</sup><br>group | TR <sup>c</sup>               | exon <sup>d</sup> |   |   |   |   |      |      |    |    |    |    |    |    |        |    | splicing <sup>e</sup> |
|                   |                               |                               | 3                 | 4 | 5 | 6 | 7 | 8    | 9    | 10 | 11 | 12 | 13 | 14 | 15 |        |    |                       |
| C - 1             | 3.1<br>ref-3.1                | 2r1                           | x                 | x | x |   | x | x    | x    |    |    | x  | x  | x  | x  | AS     |    |                       |
|                   |                               | 2r1                           | x                 | x | x | x | x | x    | x    | x  | x  | x  | x  | x  | x  |        |    |                       |
|                   |                               | r1                            |                   |   |   |   |   |      |      |    |    | x  | x  | x  | x  | AS     |    |                       |
|                   |                               | r1                            |                   |   |   |   |   |      |      |    |    | x  | x  | x  | x  | AS     |    |                       |
|                   |                               | r1'                           |                   |   |   |   |   |      |      |    |    | x  | x  | x  | x  | AS     |    |                       |
|                   |                               | r1'                           |                   |   |   |   |   |      |      |    |    | x  | x  | x  | x  | AS     |    |                       |
|                   | 2                             | 7r2                           |                   |   |   |   |   |      |      |    |    |    | x  | x  | x  | x      | AS |                       |
|                   |                               | 7r2 <sup>o2-4</sup>           |                   |   |   |   |   |      |      |    |    |    | x  | x  | x  | x      | AS |                       |
| C - 2             | 3.2                           | r1                            | x                 |   |   |   | x | x    | x    | x  | x  | x  | x  | x  | x  | AS     |    |                       |
| C - 3             | 2                             | ≈ 45r2                        | x                 | x | x | x | x | // - | STOP | x  | x  | x  | x  | x  | x  | AbS (1 |    |                       |
|                   |                               | ≈ 40r2                        | x                 | x | x | x | x | // - | STOP | x  | x  | x  | x  | x  | x  | AbS (1 |    |                       |
|                   |                               | ≈ 25r2                        | x                 | x | x | x | x | // - | STOP | x  | x  | x  | x  | x  | x  | AbS (1 |    |                       |
|                   |                               | 11r2 <sup>o2</sup>            | x                 | x | x | x | x | x    | x    | x  | x  | x  | x  | x  | x  |        |    |                       |
| C - 4             | 3.1                           | 9r1'-r1-r1'                   | x                 | x | x | x | x | x    | x    | x  | x  | x  | x  | x  | x  |        |    |                       |
|                   | 2                             | ≈ 100r2                       | x                 | x | x | x | x |      | x    | x  | x  | x  | x  | x  | x  | AS     |    |                       |
|                   |                               | ≈ 100r2 <sup>o3</sup>         | x                 | x | x | x | x |      | x    | x  | x  | x  | x  | x  | x  | AS     |    |                       |
| C - 5             | 3.1                           | 2r1'                          | x                 | x | x | x | x | x    | x    | x  | x  | x  | x  | x  | x  |        |    |                       |
|                   |                               | 2r1'                          | x                 | x | x | x | x | x    | x    | x  | x  | x  | x  | x  | x  |        |    |                       |
|                   |                               | 2r1'                          | x                 | x | x | x | x | x    | x    | x  | x  | x  | x  | x  | x  |        |    |                       |
|                   |                               | 2r1' <sup>o2</sup>            | x                 | x | x | x | x | x    | x    | x  | x  | x  | x  | x  | x  |        |    |                       |
| C - 6             | 1                             | ≈ 40r2                        | x                 | x | x | x | x | x    | x    | x  | x  | x  | x  | x  | x  |        |    |                       |
|                   |                               | ≈ 40r2                        | x                 | x | x | x | x | x    | x    | x  | x  | x  | x  | x  | x  |        |    |                       |
|                   |                               | ≈ 40r2                        | x                 | x | x | x | x | x    | x    | x  | x  | x  | x  | x  | x  |        |    |                       |
|                   | 2                             | ≈ 80r2                        | x                 | x | x | x | x | x    | x    | x  | x  | x  | x  | x  | x  |        |    |                       |
| C - 7             | 2<br>ref-2                    | ≈ 25r2                        | x                 | x | x | x | x | x    | x    | x  | x  | x  | x  | x  | x  |        |    |                       |
|                   |                               | ≈ 25r2                        | x                 | x | x | x | x | x    | x    | x  | x  | x  | x  | x  | x  |        |    |                       |
|                   |                               | ≈ 25r2                        | x                 | x | x | x | x | x    | x    | x  | x  | x  | x  | x  | x  |        |    |                       |
|                   |                               | ≈ 25r2                        | x                 | x | x | x | x | x    | x    | x  | x  | x  | x  | x  | x  |        |    |                       |
|                   |                               | ≈ 25r2                        | x                 | x | x | x | x | x    | x    | x  | x  | x  | x  | x  | x  |        |    |                       |
|                   |                               | ≈ 30r2                        | x                 | x | x | x | x | x    | x    | x  | x  | x  | x  | x  | x  |        |    |                       |
| C - 8             | 3.1                           | 2r1-2r2 <sup>o2</sup> -r1-r1' | x                 | x | x | x | x | x    | x    | x  | x  | x  | x  | x  |    |        |    |                       |
| C - 9             | 3.1                           | 2r1'                          | x                 | x | x | x | x | x    | x    | x  | x  | x  | x  | x  |    |        |    |                       |
|                   |                               | 2r1' <sup>o2</sup>            | x                 | x | x | x | x | x    | x    | x  | x  | x  | x  | x  |    |        |    |                       |
|                   |                               | 4r1-r1'-4r1                   | x                 | x | x | x | x | x    | x    | x  | x  | x  | x  | x  |    |        |    |                       |
| C - 10            | 1                             | ≈ 40r2                        | x                 | x | x | x | x | x    | x    | x  | x  | x  | x  | x  |    |        |    |                       |
|                   |                               | ≈ 40r2                        | x                 | x | x | x | x | x    | x    | x  | x  | x  | x  | x  |    |        |    |                       |
| C - 11            | 3.1                           | 4r1' <sup>o2</sup> -r1'-4r1   | x                 | x | x | x | x | x    | x    | x  | x  | x  | x  | x  |    |        |    |                       |
|                   |                               | 9r1'-r1-r1'                   | x                 | x | x | x | x | x    | x    | x  | x  | x  | x  | x  |    |        |    |                       |
|                   | 1                             | 18r2                          | x                 | x | x | x | x | x    | x    | x  | x  | x  | x  | x  |    |        |    |                       |
|                   |                               | 15r2                          | x                 | x | x | x | x | x    | x    | x  | x  | x  | x  | x  |    |        |    |                       |
|                   |                               | 15r2                          | x                 | x | x | x | x | x    | x    | x  | x  | x  | x  | x  |    |        |    |                       |

| Incompatible strain |                                  |                              |                   |          |   |   |      |      |      |      |    |    |    |    |    |         |                       |
|---------------------|----------------------------------|------------------------------|-------------------|----------|---|---|------|------|------|------|----|----|----|----|----|---------|-----------------------|
| ind <sup>a</sup>    | Sm PoMuc <sup>b</sup><br>group   | TR <sup>c</sup>              | exon <sup>d</sup> |          |   |   |      |      |      |      |    |    |    |    |    |         | splicing <sup>e</sup> |
|                     |                                  |                              | 3                 | 4        | 5 | 6 | 7    | 8    | 9    | 10   | 11 | 12 | 13 | 14 | 15 |         |                       |
| IC - 1              | 3.1                              | 9r1 <sup>*2</sup>            | x                 | x        | x | x | x    | x    | x    | x    | x  | x  | x  | x  | x  | x       |                       |
|                     |                                  | 2r1-r2-r2 <sup>*</sup> -r1'  | x                 | x        | x | x | x    | x    | x    | x    | x  | x  | x  | x  | x  | x       |                       |
|                     |                                  | 2r1                          | x                 | x        | x | x | x    | x    | x    | x    | x  | x  | x  | x  | x  | x       |                       |
|                     |                                  | 2r1                          | x                 | x        | x | x | x    | x    | x    | x    | x  | x  | x  | x  | x  | x       |                       |
|                     |                                  | 2r1                          | x                 | x        | x | x | x    | x    | x    | x    | x  | x  | x  | x  | x  | x       |                       |
|                     |                                  | 2r1                          | x                 | x        | x | x | x    | x    | x    | x    | x  | x  | x  | x  | x  | x       |                       |
|                     | r1-r1'                           | x                            | x                 | x        | x | x | x    | x    | x    |      | x  | x  | x  | x  | x  | AS      |                       |
|                     | r1 <sup>o</sup> -r1 <sup>o</sup> | x                            | x                 | x        | x | x | x    | x    | x    |      | x  | x  | x  | x  | x  | AS      |                       |
| r1-r1 <sup>*</sup>  | x                                | x                            | x                 | x        | x | x | x    | x    |      | x    | x  | x  | x  | x  | AS |         |                       |
| IC - 2              | 2                                | ≈ 25r2 <sup>*</sup>          | x                 | x        | x | x | x    | // - | STOP | x    | x  | x  | x  | x  | x  | x       | AbS (1)               |
|                     |                                  | ≈ 25r2                       | x                 | x        | x | x | x    | x    | x    | x    | x  | x  | x  | x  | x  | x       |                       |
|                     |                                  | 15r2                         | x                 | x        | x | x | x    | // - | STOP | x    | x  | x  | x  | x  | x  | x       | AbS (1)               |
|                     |                                  | 6r2                          | x                 | x        | x | x | x    | x    | x    | x    | x  | x  | x  | x  | x  | x       |                       |
|                     | 4r2                              |                              | // -              | STOP     | x | x | // - | x    | x    | x    | x  | x  | x  | x  | x  | AbS (3) |                       |
|                     | 3.1                              | r1-2r2 <sup>o2</sup> -r1-r1' | x                 | x        | x | x | x    | x    | x    | x    | x  | x  | x  | x  | x  | x       |                       |
|                     |                                  | r1-2r2-r1-r1'                | x                 | x        | x | x | x    | x    | x    | x    | x  | x  | x  | x  | x  | x       |                       |
|                     |                                  | r1-2r2-r1-r1'                | x                 | x        | x | x | x    | x    | x    | x    | x  | x  | x  | x  | x  | x       |                       |
| 2r1-r1'             |                                  | x                            | x                 | x        | x | x | x    | x    | x    | x    | x  | x  | x  | x  | x  |         |                       |
| IC - 3              | 2                                | ≈ 40r2                       | x                 | x        | x | x | x    | x    | x    | x    | x  | x  | x  | x  | x  | x       |                       |
|                     |                                  | ≈ 30r2                       | x                 | x        | x | x | x    | x    | x    | x    | x  | x  | x  | x  | x  | x       |                       |
|                     |                                  | ≈ 25r2                       | x                 | x        | x | x | x    | x    | x    | x    | x  | x  | x  | x  | x  | x       |                       |
|                     |                                  | 4r2                          | x                 | x        | x | x | x    | x    | x    | x    | x  | x  | x  | x  | x  | x       |                       |
| IC - 4              | 2                                | 11r2 <sup>*11</sup>          | x                 | x        | x | x | x    | // - | STOP | x    | x  | x  | x  | x  | x  | x       | AbS (1)               |
|                     |                                  | 13r2 <sup>o13</sup>          | x                 | x        | x | x | x    | // - | STOP | x    | x  | x  | x  | x  | x  | x       | AbS (1)               |
|                     |                                  | ≈ 25r2                       | x                 | x        | x | x | x    | // - | STOP | x    | x  | x  | x  | x  | x  | x       | AbS (1)               |
|                     |                                  | ≈ 30r2 <sup>oN-1</sup>       | x                 | x        | x | x | x    | x    | // - | STOP | x  | x  | x  | x  | x  | x       | AbS (1)               |
|                     |                                  | 10r2                         | x                 | x        | x | x | x    | x    | x    | x    | x  | x  | x  | x  | x  | x       |                       |
| IC - 5              | 3.1                              | 10r1 //+ STOP                | x                 | x        | x | x | x    | x    | x    | x    | x  | x  | x  | x  | x  | x       | AbS (4)               |
|                     |                                  | 12r1 <sup>*7</sup>           | x                 | //+ STOP | x | x | x    | x    | x    | x    | x  | x  | x  | x  | x  | x       | AbS (6)               |
|                     |                                  | 11r1 <sup>*10</sup> //+      | x                 | //+ STOP | x | x | x    | x    | x    | x    | x  | x  | x  | x  | x  | x       | AbS (5)               |
|                     |                                  | 11r1 <sup>*3</sup>           | x                 | x        | x | x | x    | x    | x    | x    | x  | x  | x  | x  | x  | x       |                       |
|                     |                                  | 11r1                         | x                 | x        | x | x | x    | x    | x    | x    | x  | x  | x  | x  | x  | x       |                       |
|                     |                                  | 8r1                          | x                 | x        | x | x | x    | x    | x    | x    | x  | x  | x  | x  | x  | x       |                       |
|                     | ref-3.1                          | 2r1-2r2-r1-r1'               | x                 | x        | x | x | x    | x    | x    | x    | x  | x  | x  | x  | x  | x       |                       |
|                     |                                  | 2r1-2r2-r1-r1'               | x                 | x        | x | x | x    | x    | x    | x    | x  | x  | x  | x  | x  | x       |                       |
|                     |                                  | 2                            | r2                | x        | x | x | x    | x    | x    | x    | x  | x  | x  | x  | x  | x       |                       |
|                     |                                  | 10r2 <sup>*10</sup>          |                   |          |   |   |      |      | x    | x    | x  | x  | x  | x  | x  | x       | AS                    |
| IC - 6              | 2                                | ≈ 25r2 <sup>oN-1</sup>       | x                 | x        | x | x | x    | // - | STOP | x    | x  | x  | x  | x  | x  | x       | AbS (1)               |
|                     |                                  | ≈ 25r2 <sup>*7</sup>         | x                 | x        | x | x | x    | // - | STOP | x    | x  | x  | x  | x  | x  | x       | AbS (1)               |
|                     |                                  | ≈ 25r2                       | x                 | x        | x | x | x    | x    | x    | x    | x  | x  | x  | x  | x  | x       |                       |
|                     |                                  | ≈ 25r2                       | x                 | x        | x | x | x    | // - | STOP | x    | x  | x  | x  | x  | x  | x       | AbS (1)               |
|                     |                                  | 15r2                         | x                 | x        | x | x | x    | // - | STOP | x    | x  | x  | x  | x  | x  | x       | AbS (1)               |
| IC - 7              | 3.1                              | 2r1                          | x                 | x        | x | x | x    | x    | x    | x    | x  | x  | x  | x  | x  |         |                       |
|                     |                                  | 2r1                          | x                 | x        | x | x | x    | x    | x    | x    | x  | x  | x  | x  | x  | x       |                       |

|         |     |                         |   |      |      |   |   |      |      |   |   |   |   |   |   |         |
|---------|-----|-------------------------|---|------|------|---|---|------|------|---|---|---|---|---|---|---------|
|         |     | 3r1                     | x | x    | x    | x | x | x    | x    | x | x | x | x | x |   |         |
|         |     | 2r1-2r2-r1-r1'          | x | x    | x    | x | x | x    | x    | x | x | x | x | x |   |         |
|         | 2   | ≈ 30r2                  | x | x    | x    | x | x | // - | STOP | x | x | x | x | x | x | AbS (1) |
|         |     | ≈ 30r2                  | x | x    | x    | x | x |      |      | x | x | x | x | x | x | AS      |
|         |     | ≈ 35r2 <sup>*f1</sup>   | x | x    | x    | x | x | // - | STOP | x | x | x | x | x | x | AbS (1) |
|         |     | 18r2                    | x | x    | x    | x | x | // - | STOP | x | x | x | x | x | x | AbS (1) |
| IC - 8  | 2   | 8r2                     | x | x    | x    | x | x | // - | STOP | x | x | x | x | x | x | AbS (1) |
|         |     | 8r2                     | x | x    | x    | x | x | // - | STOP | x | x | x | x | x | x | AbS (1) |
|         |     | 8r2                     | x | x    | x    | x | x | // - | STOP | x | x | x | x | x | x | AbS (1) |
|         |     | 7r2                     | x | x    | x    | x | x | // - | STOP | x | x | x | x | x | x | AbS (1) |
|         |     | r2                      | x | x    | x    | x | x | // - | STOP | x | x | x | x | x | x | AbS (1) |
|         | 3.1 | 2r1-2r2-r1-r1'          | x | x    | x    | x | x | x    | x    | x | x | x | x | x | x |         |
|         |     | 5r1                     | x | x    | x    | x | x | x    | x    | x | x | x | x | x | x |         |
| IC - 9  | 2   | ≈ 25r2                  | x | x    | x    | x | x |      |      | x | x | x | x | x | x | AS      |
|         |     | 5r2                     | x | x    | x    | x | x | // - | STOP | x | x | x | x | x | x | AbS (1) |
|         |     | 3r2                     | x | x    | x    | x | x |      |      | x | x | x | x | x | x | AS      |
|         |     | 9r2 <sup>*2</sup>       | x | x    | x    | x | x | // - | STOP | x | x | x | x | x | x | AbS (1) |
|         |     | 7r2                     | x | x    | x    | x | x | x    | x    | x | x | x | x | x | x |         |
|         |     | 2r2                     | x | x    | x    | x | x |      |      | x | x | x | x | x | x | AS      |
|         |     | 15r2                    | x | x    | x    | x | x | // - | STOP | x | x | x | x | x | x | AbS (1) |
|         |     | 14r2                    | x | x    | x    | x | x | // - | STOP | x | x | x | x | x | x | AbS (1) |
|         | 3.1 | 4r1 <sup>o4</sup>       | x | x    | x    | x | x | x    | x    | x | x | x | x | x | x |         |
|         |     | r1-r1*                  | x | x    | x    | x | x | x    | x    | x | x | x | x | x | x |         |
| IC - 10 | 2   | ≈ 25r2                  | x | x    | x    | x | x | x    | x    | x | x | x | x | x | x |         |
|         |     | ≈ 30r2                  | x | x    | x    | x | x | x    | x    | x | x | x | x | x | x |         |
|         |     | ≈ 30r2                  | x | x    | x    | x | x | x    | x    | x | x | x | x | x | x |         |
|         |     | ≈ 30r2                  | x | x    | x    | x | x |      |      | x | x | x | x | x | x | AS      |
|         |     | 15r2 <sup>*14</sup>     | x | x    | x    | x | x |      |      | x | x | x | x | x | x | AS      |
|         | 3.1 | 2r1-2r2-r1-r1'          | x | x    | x    | x | x | x    | x    | x | x | x | x | x | x |         |
|         |     | 11r1 <sup>o11</sup>     | x | x    | x    | x | x | x    | x    | x | x | x | x | x | x |         |
|         |     | 11r1                    | x | x    | x    | x | x | x    | x    | x | x | x | x | x | x |         |
|         |     | 11r1 <sup>o1</sup>      | x | x    | x    | x | x | x    | x    | x | x | x | x | x | x |         |
| IC - 11 | 2   | ≈ 20r2 <sup>*f1-1</sup> | x | x    | x    | x | x | // - | STOP | x | x | x | x | x | x | AbS (1) |
|         |     | ≈ 30r2                  | x | x    | x    | x | x | // - | STOP | x | x | x | x | x | x | AbS (1) |
|         |     | ≈ 30r2                  | x | x    | x    | x | x |      |      | x | x | x | x | x | x |         |
|         |     | ≈ 30r2 <sup>o1-3</sup>  | x | x    | x    | x | x | // - | STOP | x | x | x | x | x | x | AbS (1) |
|         |     | ≈ 30r2                  | x | x    | x    | x | x | // - | STOP | x | x | x | x | x | x | AbS (1) |
|         |     | 7r2                     | x | // - | STOP | x | x | x    | x    | x | x | x | x | x | x | AbS (2) |
|         |     | 10r2                    | x | x    | x    | x | x | // - | STOP | x | x | x | x | x | x | AbS (1) |
|         |     | 13r2                    | x | x    | x    | x | x | // - | STOP | x | x | x | x | x | x | AbS (1) |
