# Supplementary material for: Controlled Chaos of Polymorphic Mucins in a Metazoan Parasite (Schistosoma mansoni) Interacting with Its Invertebrate Host (Biomphalaria glabrata)
Source: PLoS Negl Trop Dis. 2008 Nov 11;2(11):e330. doi: 10.1371/journal.pntd.0000330 (PMC2576457; doi:10.1371/journal.pntd.0000330)
Supplement: Table S2 — Glycosylation prediction on Tandem Repeats from Compatible and Incompatible cDNA variants. aStrain Compatible (C) or Incompatible (IC) and individual number (1–11). bVariant Id. = Variant Identification (Individual/SmPoMuc group/associated tandem repeat stretch). SmPoMuc groups are color coded: gr1, 2, and 3.1 in blue, yellow and purple, respectively. cSplicing variant are indicated by a red box: - AS = Alternative Splicing with conservation of ORF. - AbS (x) = Aberrant Splicing; x refer to AbS type described in Figure 9. dTR = Tandem Repeats contained in each variant. - number and type of TR is indicated. - °(x) Synonymous mutation (SM) present in the xth repeat of the stretch. - *(x) Non synonymous mutation (NSM) present in the xth repeat of the stretch. eGlycosylation site prediction in tandem repeats from the different variants: - repeats containing no prediction site are represented as white boxes. - r1 and r2 repeats containing 1 prediction site on T9 are represented as dark grey boxes. - r2 repeats containing 2 prediction sites on S5 and T9 are represented as dotted boxes. (389 KB PDF) [file pntd.0000330.s002.pdf]

|         |                          |         |                        |  |
|---------|--------------------------|---------|------------------------|--|
|         | IC3/2/4r2                | NO      | 4r2                    |  |
| IC - 4  | IC4/2/11r2               | AbS (1) | 11r2 <sup>+11</sup>    |  |
|         | IC4/2/13r2               | AbS (1) | 13r2 <sup>+13</sup>    |  |
|         | IC4/2/25r2               | AbS (1) | ≈ 25r2                 |  |
|         | IC4/2/30r2               | AbS (1) | ≈ 30r2 <sup>+30</sup>  |  |
|         | IC4/2/10r2               | NO      | 10r2                   |  |
|         |                          |         |                        |  |
| IC - 5  | IC5/3.1/10r1             | AbS (4) | 10r1 //STOP            |  |
|         | IC5/3.1/12r1             | AbS (6) | 12r1 <sup>+7</sup>     |  |
|         | IC5/3.1/11r1.1           | AbS (5) | 11r1 <sup>+10</sup> // |  |
|         | IC5/3.1/11r1.2           | NO      | 11r1 <sup>+3</sup>     |  |
|         | IC5/3.1/11r1.3           | NO      | 11r1                   |  |
|         | IC5/3.1/8r1              | NO      | 8r1                    |  |
|         | IC5/3.1/2r1-2r2-r1-r1'.1 | NO      | 2r1-2r2-r1-r1'         |  |
|         | IC5/3.1/2r1-2r2-r1-r1'.2 | NO      | 2r1-2r2-r1-r1'         |  |
|         | IC5/2/r2                 | NO      | r2                     |  |
|         | IC5/2/10r2               | AS      | 10r2 <sup>+10</sup>    |  |
| IC - 6  | IC6/2/25r2.1             | AbS (1) | ≈ 25r2 <sup>+25</sup>  |  |
|         | IC6/2/25r2.2             | AbS (1) | ≈ 25r2 <sup>+7</sup>   |  |
|         | IC6/2/25r2.3             | NO      | ≈ 25r2                 |  |
|         | IC6/2/25r2.4             | AbS (1) | ≈ 25r2                 |  |
|         | IC6/2/15r2               | AbS (1) | 15r2                   |  |
| IC - 7  | IC7/3.1/2r1.1            | NO      | 2r1                    |  |
|         | IC7/3.1/2r1.2            | NO      | 2r1                    |  |
|         | IC7/3.1/3r1              | NO      | 3r1                    |  |
|         | IC7/3.1/2r1-2r2-r1-r1'   | NO      | 2r1-2r2-r1-r1'         |  |
|         | IC7/2/30r2.1             | AbS (1) | ≈ 30r2                 |  |
|         | IC7/2/30r2.2             | AS      | ≈ 30r2                 |  |
|         | IC7/2/35r2               | AbS (1) | ≈ 35r2 <sup>+35</sup>  |  |
|         | IC7/2/18r2               | AbS (1) | 18r2                   |  |
| IC - 8  | IC8/2/8r2.1              | AbS (1) | 8r2                    |  |
|         | IC8/2/8r2.2              | AbS (1) | 8r2                    |  |
|         | IC8/2/8r2.3              | AbS (1) | 8r2                    |  |
|         | IC8/2/7r2                | AbS (1) | 7r2                    |  |
|         | IC8/2/r2                 | AbS (1) | r2                     |  |
|         | IC8/3.1/2r1-2r2-r1-r1'   | NO      | 2r1-2r2-r1-r1'         |  |
|         | IC8/3.1/5r1              | NO      | 5r1                    |  |
| IC - 9  | IC9/2/25r2               | AS      | ≈ 25r2                 |  |
|         | IC9/2/5r2                | AbS (1) | 5r2                    |  |
|         | IC9/2/3r2                | AS      | 3r2                    |  |
|         | IC9/2/9r2                | AbS (1) | 9r2 <sup>+2</sup>      |  |
|         | IC9/2/7r2                | NO      | 7r2                    |  |
|         | IC9/2/2r2                | AS      | 2r2                    |  |
|         | IC9/2/15r2               | AbS (1) | 15r2                   |  |
|         | IC9/2/14r2               | AbS (1) | 14r2                   |  |
|         | IC9/3.1/4r1              | NO      | 4r1 <sup>+4</sup>      |  |
|         | IC9/3.1/2r1              | NO      | r1-r1'                 |  |
| IC - 10 | IC10/2/25r2              | NO      | ≈ 25r2                 |  |
|         | IC10/2/30r2.1            | NO      | ≈ 30r2                 |  |
|         | IC10/2/30r2.2            | NO      | ≈ 30r2                 |  |
|         | IC10/2/30r2.3            | AS      | ≈ 30r2                 |  |
|         | IC10/2/15r2              | AS      | 15r2 <sup>+14</sup>    |  |
|         | IC10/3.1/2r1-2r2-r1-r1'  | NO      | 2r1-2r2-r1-r1'         |  |
|         | IC10/3.1/11r1.1          | NO      | 11r1 <sup>+11</sup>    |  |
| IC - 11 | IC11/2/20r2              | AbS (1) | ≈ 20r2 <sup>+20</sup>  |  |
|         | IC11/2/30r2.1            | AbS (1) | ≈ 30r2                 |  |
|         | IC11/2/30r2.2            | NO      | ≈ 30r2                 |  |
|         | IC11/2/30r2.3            | AbS (1) | ≈ 30r2 <sup>+33</sup>  |  |
|         | IC11/2/30r2.4            | AbS (1) | ≈ 30r2                 |  |
|         | IC11/2/7r2               | AbS (2) | 7r2                    |  |
|         | IC11/2/10r2              | AbS (1) | 10r2                   |  |
|         | IC11/2/13r2              | AbS (1) | 13r2                   |  |
